# Supplementary material for: IL28B expression depends on a novel TT/-G polymorphism which improves HCV clearance prediction
Source: PubMed Central journal article supplement — J Exp Med. 2013 Jun 3;210(6):1109–16. doi: 10.1084/jem.20130012 (PMC3674704; doi:10.1084/jem.20130012), 2013-06-03
Supplement: supp_jem.20130012_JEM_20130012_sm.pdf [file supp_jem.20130012_JEM_20130012_sm.pdf]

## SUPPLEMENTAL MATERIAL

Bibert et al., <http://www.jem.org/cgi/content/full/jem.20130012/DC1>**Table S1.** Patient characteristics

| Proportion                                        | Response to treatment <i>n</i> = 540 | Spontaneous clearance <i>n</i> = 93 |
|---------------------------------------------------|--------------------------------------|-------------------------------------|
| Male sex                                          | 0.64                                 | 0.55                                |
| White ethnicity                                   | 1.00                                 | 1.00                                |
| Median age (IQR) <sup>a</sup>                     | 45 (14)                              | 38 (10)                             |
| HCV genotype <sup>b</sup>                         |                                      |                                     |
| 1                                                 | 0.44                                 | NA                                  |
| 2                                                 | 0.13                                 | NA                                  |
| 3                                                 | 0.34                                 | NA                                  |
| 4                                                 | 0.09                                 | NA                                  |
| HCV RNA $\geq 6 \log_{10}$ copies/ml <sup>c</sup> | 0.52                                 | NA                                  |
| Median ALT (IU/L, IQR) <sup>d</sup>               | 79 (81)                              | NA                                  |
| HCV reported risks                                |                                      |                                     |
| Drug use                                          | 0.38                                 | NA                                  |
| Invasive procedures / needle stick                | 0.22                                 | NA                                  |
| Transfusion                                       | 0.17                                 | NA                                  |
| Other/Unknown                                     | 0.21                                 | NA                                  |
| Alcohol consumption <sup>e</sup>                  |                                      |                                     |
| >40 g/d for $\geq 5$ yr                           | 0.20                                 | NA                                  |
| Diabetes                                          | 0.09                                 | NA                                  |
| Median BMI (kg/m <sup>2</sup> , IQR) <sup>f</sup> | 24 (5)                               | NA                                  |
| HIV <sup>g</sup>                                  | 0.05                                 | NA                                  |
| Chronic HBV infection <sup>h</sup>                | 0.03                                 | NA                                  |
| Biopsy                                            |                                      |                                     |
| Histological activity <sup>i</sup>                |                                      |                                     |
| 0 (none or minimal)                               | 0.34                                 | NA                                  |
| 1 (mild, moderate or severe)                      | 0.66                                 | NA                                  |
| Fibrosis stage (Metavir) <sup>j</sup>             |                                      |                                     |
| 0–1                                               | 0.28                                 | NA                                  |
| 2–4                                               | 0.72                                 | NA                                  |
| Steatosis <sup>k</sup>                            | 0.67                                 | NA                                  |

Numbers are the proportion of patients with indicated characteristics.

<sup>a</sup>Age at treatment start for patients with chronic infection, at cohort entry for those with spontaneous clearance.

<sup>b</sup>HCV genotypes are missing in most patients with spontaneous clearance.

<sup>c</sup>Median RNA before treatment was  $6 \log_{10}$  copies/ml; data were missing in 63 patients.

<sup>d</sup>ALT value before treatment was missing in 168 patients.

<sup>e</sup>Alcohol consumption data before treatment was missing in 8 patients.

<sup>f</sup>BMI before/during treatment was missing in 75 patients.

<sup>g</sup>HIV serology was missing in 95 patients.

<sup>h</sup>HBV serology was missing in 106 patients.

<sup>i</sup>Histological activity before treatment was missing in 165 patients.

<sup>j</sup>Fibrosis stage before treatment was missing in 164 patients.

<sup>k</sup>Steatosis data before treatment were missing in 113 patients.

**Table S2.** Genotypic association of *IL28B* polymorphisms with response to pegylated IFN- $\alpha$  and ribavirin in chronically infected HCV patients

| Polymorphisms     | Genotype | n   | Prop. SVR <sup>a</sup> | Univariate models <sup>b</sup> (n = 540) |                    | Multivariate models <sup>b,c</sup> (n = 360) |                    |
|-------------------|----------|-----|------------------------|------------------------------------------|--------------------|----------------------------------------------|--------------------|
|                   |          |     |                        | OR (95% CI)                              | P                  | OR (95% CI)                                  | P                  |
| <i>rs12979860</i> | TT/TT    | 189 | 0.80                   |                                          |                    |                                              |                    |
|                   | TT/-G    | 292 | 0.55                   | 0.30 (0.20–0.46)                         | 3.03 <sup>-8</sup> | 0.18 (0.09–0.36)                             | 6.95 <sup>-7</sup> |
|                   | -G/-G    | 59  | 0.41                   | 0.17 (0.09–0.31)                         | 2.77 <sup>-8</sup> | 0.11 (0.04–0.33)                             | 7.17 <sup>-5</sup> |
|                   | CC       | 189 | 0.77                   |                                          |                    |                                              |                    |
|                   | CT       | 289 | 0.56                   | 0.38 (0.25–0.58)                         | 4.41 <sup>-6</sup> | 0.24 (0.13–0.46)                             | 1.82 <sup>-5</sup> |
|                   | TT       | 62  | 0.45                   | 0.24 (0.13–0.44)                         | 4.42 <sup>-6</sup> | 0.20 (0.07–0.53)                             | 1.34 <sup>-3</sup> |

OR stands for odds ratio and CI for confidence interval.

<sup>a</sup>Data indicate the proportion of patients with SVR for indicated host genotypes.

<sup>b</sup>Odds ratios and p-values for heterozygous and homozygous mutant patients versus WT patients.

<sup>c</sup>Multivariate models are adjusted for age, sex, HCV RNA level, fibrosis stage, and viral genotype. Multivariate models included a smaller number of patients, due to missing covariates in some patients.

**Table S3.** Primers

|                      | Forward                        | Reverse                      | Vic probe      | Fam probe       |
|----------------------|--------------------------------|------------------------------|----------------|-----------------|
| RT-PCR amplification |                                |                              |                |                 |
| IL28B                | 5'-CAGCTGCAGGTGAGGGAGCGCCCG-3' | 5'-GGTGGCCTCCAGAACCTT-3'     |                |                 |
| IP-10                | 5'-CTGCTTTGGGGTTTATCAGA-3'     | 5'-CCACTGAAAGAATTTGGGC-3'    |                |                 |
| TNF                  | 5'-CAGAGGGCCTGTACCTCATC-3'     | 5'-GGAAGACCCCTCCAGATAG-3'    |                |                 |
| HPRT                 | 5'-GAACGTCTTGCTCGAGATGTG-3'    | 5'-CCAGCAGGTCAGCAAAGAATT-3'  |                |                 |
| PCR amplification    |                                |                              |                |                 |
| PAun                 | 5'-TCAGCCTCGCTGGTCTCC-3'       | 5'-TGCTGTGCCTTCACGCTCCG-3'   |                |                 |
| BSPA                 | 5'-GTTTTAGGGGTATAGGGGTTG-3'    | 5'-AAACCCTCTTTAACTTCCTAAC-3' |                |                 |
| SNP genotyping       |                                |                              |                |                 |
| NCBI dbSNP ID        |                                |                              |                |                 |
| <i>rs12979860</i>    | 5'-TGTA CTGAAC CAGGGAGCTC-3'   | 5'-GC GCGGAGTGCAATCAAC-3'    | TGGTTCGCGCCTTC | CTGGTTCACGCCTTC |
| TT/-G                | 5'-CTCCAGCGAGCGGTAGTG-3'       | 5'-GATGCGGCCGAGTGTCT-3'      | TCGCAGAAGGCC   | ATCGCAGCGGCC    |

Fragments containing the TT/-G were amplified from unmethylated DNA with PAun primers and from bisulfite-modified DNA, with bisulfite sequencing primers (BSPA) designed using MethPrimer
